# Supplementary material
Source: publisher site journal article supplement (https://www.dovepress.com/article/367400)
Supplement: Supplementary file 1 [file get_supplementary_file.php]

**Supplemental Material**

**Table S1 Summary of participants’ characteristics.**

| Participants | | Total n=207 | Subgroup n=141 | *P* |
| --- | --- | --- | --- | --- |
| Age, years | | 48.2±14.7 | 49.0±14.6 | 0.419 |
| Gender: male(%) | | 145(70%) | 103(73.0%) | 0.245 |
| BMI(kg/m2) | | 27.6 ± 4.8 | 28.0±4.8 | 0.925 |
| AHI(events/h) | | 28.6±25.2 | 29.9±25.9 | 0.991 |
| OSA severity | |  |  |  |
|  | No OSA(%) | 35(16.9%) | 19(13.5%) | 0.281 |
|  | Mild OSA(%) | 40(19.3%) | 27(19.1%) | 0.952 |
|  | Moderate OSA(%) | 60(29.0%) | 45(31.9%) | 0.448 |
|  | Severe OSA(%) | 72(34.8%) | 50(35.5%) | 0.862 |

**Abbreviations:** BMI: body mass index; AHI: apnea-hypopnea index; OSA: obstructive sleep apnea*.*

**Table S2 Comparison of parameters observed in PSG, Circul oximetry and simultaneous in-lab Pulsox 300i oximetry (n=141).**

|  | **PSG** | **Circul** | **Pulsox 300i** | ***P***† |
| --- | --- | --- | --- | --- |
|  | **Mean±SD** | **Mean±SD** | **Mean±SD** |
| **AHI/ODI** | 29.9±25.9 | 23.4±25.5a | 23.7±21.5b | <0.001 |
| **ODI** | 26.6±25.4 | 23.4±25.5a | 23.7±21.5b | <0.001 |
| **MSpO2*** | 95.0% (92.0%-96.0%) | 95.2% (93.8-96.3)a | 94.5% (93.2%-95.7%)b,c | <0.001 |
| **CT90/TST(%)*** | 1.53% (0.14%-10.02%) | 1.86%(0.22%-8.36%)a | 1.70% (0.29%-11.9%)c | 0.002 |
| **CT90(min)*** | 5.50(0.58-36.23) | 7.50(0.83-36.63)a | 8.91(1.54-67.67)b,c | <0.001 |

Notes: *Data are presented as median (IQR). †P-value from analysis of variance(ANOVO) test comparing measures among PSG, Circul and Pulsox test; aP<0.05(PSG vs Circul); bP<0.05(PSG vs Pulsox); cP<0.05(Circul vs Pulsox).

Abbreviations: AHI: apnea-hypopnea index; ODI: 3% oxygen desaturation index; MSpO2: mean oxygen saturation; CT90: cumulative time at SpO2<90%; CT90/TST: cumulative percentage of sleep time spent with SpO2<90%
